# Supplementary material for: Non-aqueous synthetic methodology for TiW5 polyoxometalates: protonolysis of [(MeO)TiW5O18]3– with alcohols, water and phenols
Source: Royal Society of Chemistry journal article supplement (doi:10.1039/b709732h), 2007-01-01
Supplement: b709732h.pdf [file b709732h.pdf]

**Non-aqueous synthetic methodology for  $\text{TiW}_5$  polyoxometalates: protonolysis of  $[(\text{MeO})\text{TiW}_5\text{O}_{18}]^{3-}$  with alcohols, water and phenols.**

R. John Errington,\* Sagar S. Petkar, Paul S. Middleton, William McFarlane, William Clegg, Robert A. Coxall and Ross W. Harrington.

Supplementary material.

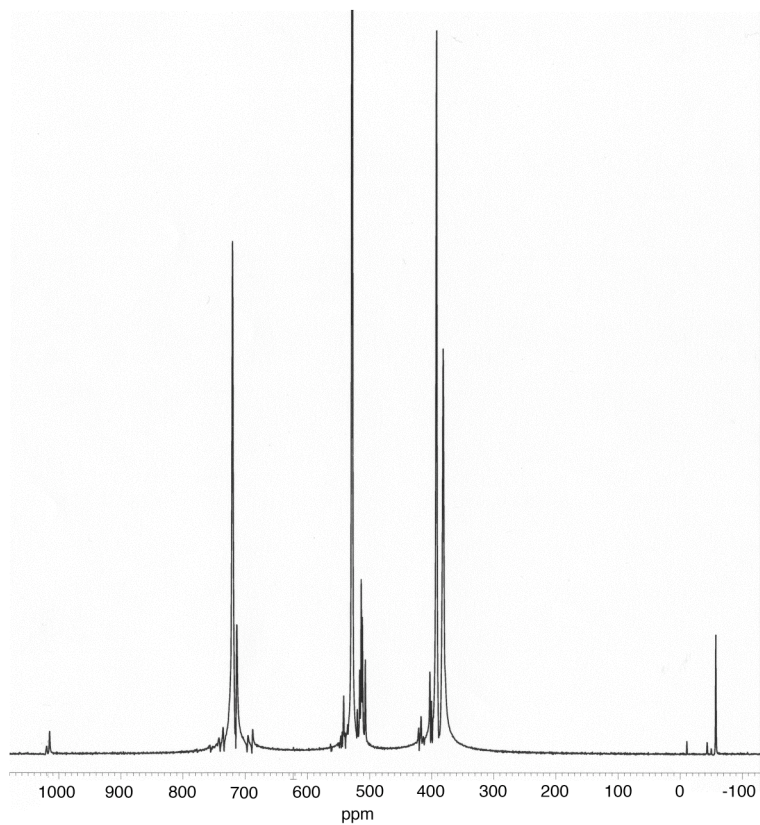

$^{17}\text{O}$  NMR spectrum of  $(\text{TBA})_3[(^t\text{BuO})\text{TiW}_5\text{O}_{18}]$  prior to purification.
